# Supplementary material for: The influences of low protein diet on the intestinal microbiota of mice
Source: PubMed Central journal article supplement (PMC7555506; doi:10.1038/s41598-020-74122-9), 2020-10-13
Supplement: 41598_2020_74122_MOESM1_ESM.pdf [file 41598_2020_74122_MOESM1_ESM.pdf]

The influences of low protein diet on the intestinal microbiota of mice

Hiroaki Masuoka<sup>1\*</sup>, Wataru Suda<sup>2\*</sup>, Eriko Tomitsuka<sup>3</sup>, Chie Shindo<sup>2</sup>, Lena Takayasu<sup>2,4</sup>, Paul Horwood<sup>5,6</sup>, Andrew R. Greenhill<sup>6,7</sup>, Masahira Hattori<sup>2,8</sup>, Masahiro Umezaki<sup>4</sup>, and Kazuhiro Hirayama<sup>1</sup>

<sup>1</sup> Department of Veterinary Medical Science, Graduate School of Agricultural and Life Sciences, The University of Tokyo, Tokyo, Japan

<sup>2</sup> RIKEN Center for Integrative Medical Sciences, Yokohama, Japan

<sup>3</sup> Department of Health Chemistry, Faculty of Pharmaceutical Sciences, Niigata University of Pharmacy and Applied Sciences, Niigata, Japan

<sup>4</sup> Department of Human Ecology, Graduate School of Medicine, The University of Tokyo, Tokyo, Japan

<sup>5</sup> College of Public Health, Medical and Veterinary Sciences, James Cook University, Townsville, Australia

<sup>6</sup> Papua New Guinea Institute of Medical Research, Goroka, Papua New Guinea

<sup>7</sup> School of Science, Psychology and Sport, Federation University Australia, Churchill, Australia

<sup>8</sup> Graduate School of Advanced Science and Engineering, Waseda University, Tokyo, Japan

\* hiroaki-masuoka@g.ecc.u-tokyo.ac.jp

\* wataru.suda@riken.jp

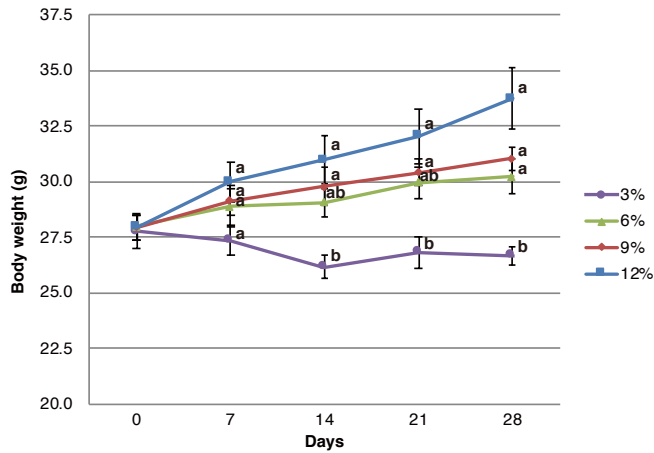

Supplementary Figure S1. Changes in raw body weight in over 4 weeks in the first experiment. Each group of mice (n=5) was fed a diet with different protein concentration (3, 6, 9, and 12%). The mean and standard error of the mean (SEM) are shown. Plots indicated with the same letters (**a**, **b** and **c**) on the same days were not significantly different at  $P < 0.05$  by Tukey-Kramer test.

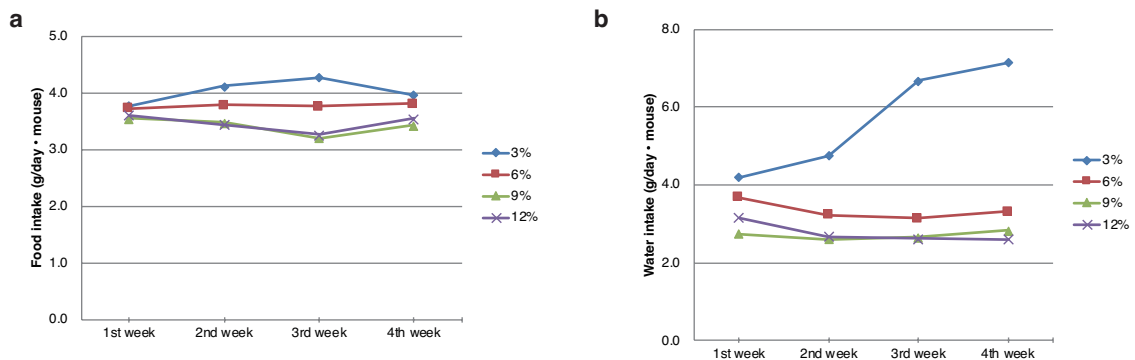

Supplementary Figure S2. Food and water intakes of mice fed different protein diets in the first experiment. Mean values for each week are shown. “1st week” means the period from day 1 to day 7, “2nd week” means the period from day 8 to day 14, “3rd week” means the period from day 15 to day 21 and “4th week” means the period from day 22 to day 28. **(a)** Consumption of food per day (average) in mice according to protein diet. **(b)** Consumption of water per day (average) in mice according to protein diet.

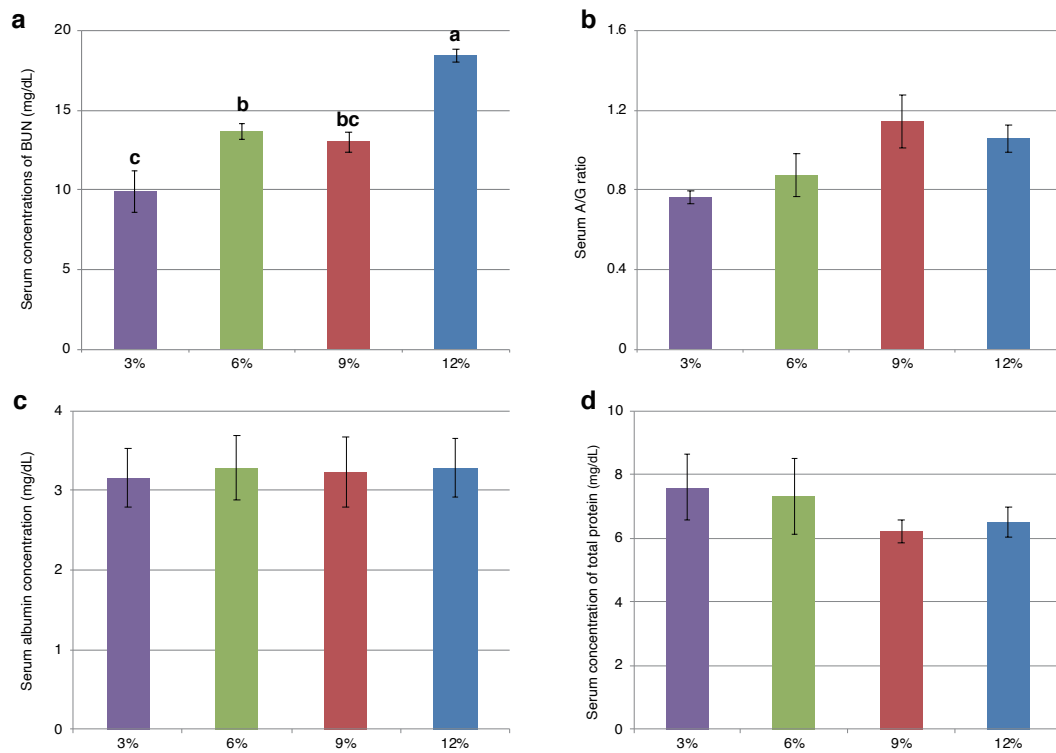

Supplementary Figure S3. Nutritional levels from blood analysis of mice fed differing protein diets in the first experiment. The mean and standard error of the mean (SEM) are shown. Bars in **a** indicated with the same letters (a, b and c) on the same days were not significantly different at  $P < 0.05$  by Tukey-Kramer test. There were no differences between each group in **b**, **c** and **d**. **(a)** Serum concentration of urea nitrogen (UN). **(b)** Serum albumin-globulin (A/G) ratio. **(c)** Serum albumin concentration. **(d)** Serum concentration of total protein.

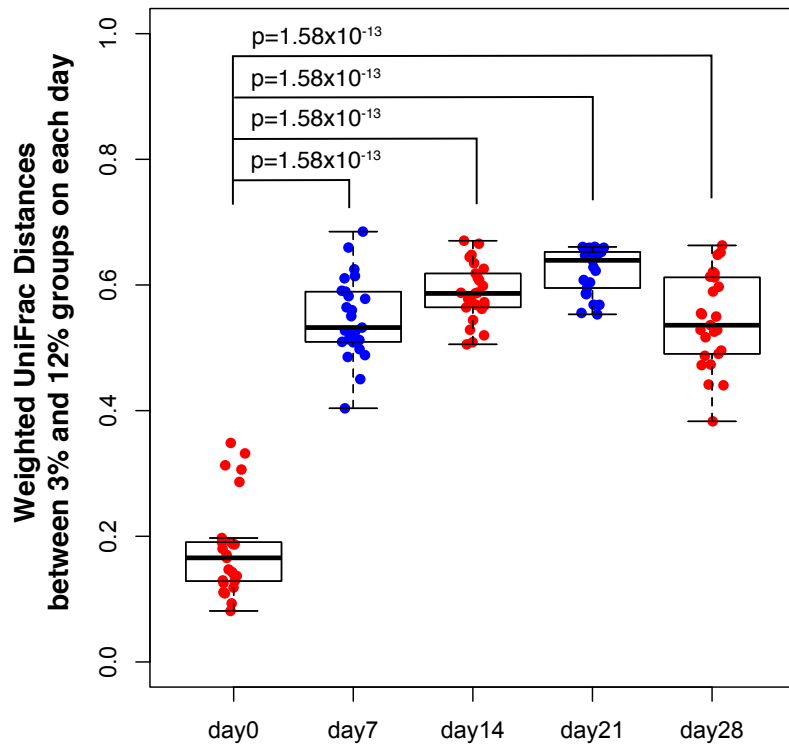

Supplementary Figure S4. Weighted UniFrac distances between 3% and 12% diet groups on each day. The label of data on day 0, 7, 14, 21 and 28, were shown as day 0, day 7, day 14, day 21 and day 28 respectively.

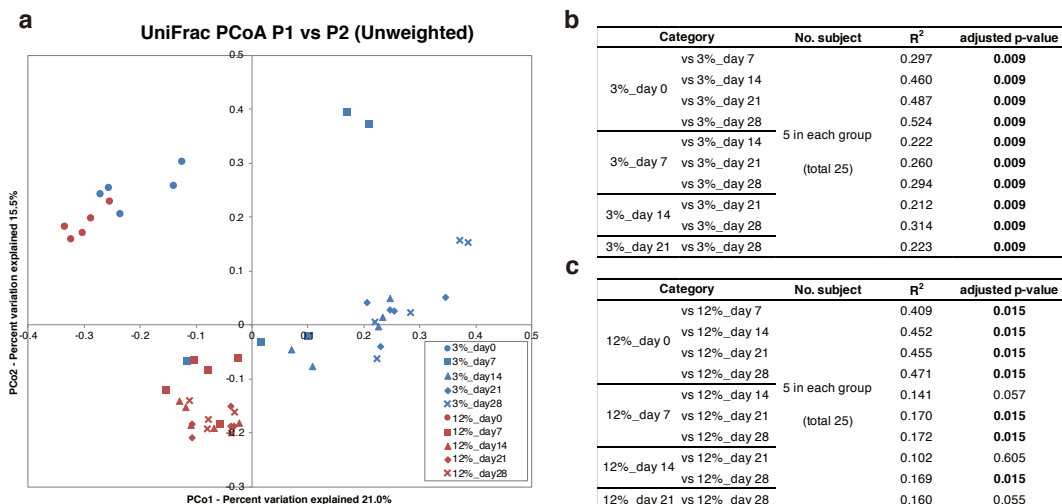

Supplementary Figure S5. (a) Principal coordinates analysis (PCoA) plot based on the unweighted UniFrac distances for intestinal microbiota composition in mice in each group in the second experiment. Plots of the 3% protein group were shown in blue and those of the 12% protein

group were shown in red. **(b)** Evaluation of dissimilarity of the 3% protein group by PERMANOVA in the analysis of unweighted UniFrac distance.  $R^2$  indicates coefficient of determination. Significant adjusted p values are in bold. **(c)** Evaluation of dissimilarity of the 12% protein group by PERMANOVA in the analysis of unweighted UniFrac distance.  $R^2$  indicates coefficient of determination. Significant adjusted P values are in bold.

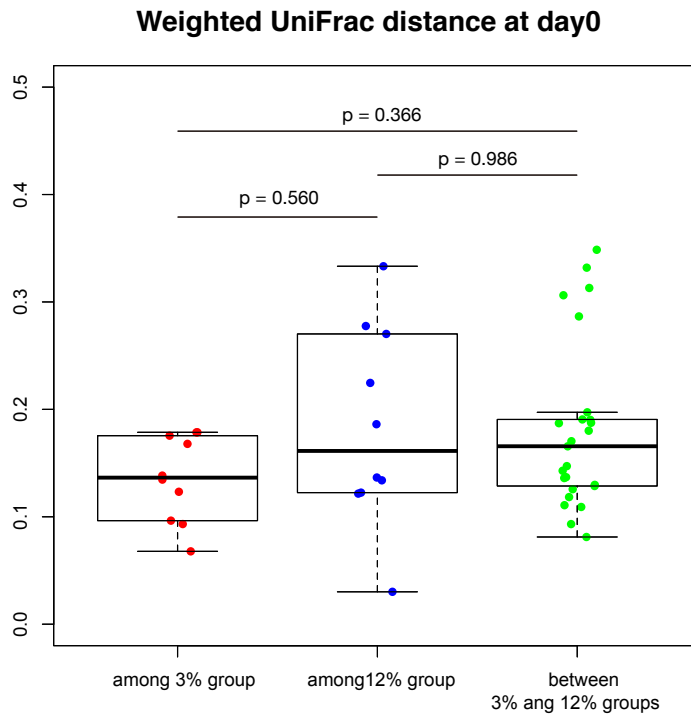

Supplementary Figure S6. Comparison between weighted UniFrac distance in intestinal microbiota at baseline among mice of 3% protein group (red), among mice of 12% protein group (blue) and among mice of 3% and 12% protein groups together (green).

Supplementary Table S1. (a) The list of taxa in the 3% protein group at phylum level with more than 0.1% abundance in at least one group. (b) The list of taxa in the 12% protein group at phylum level with more than 0.1% abundance in at least one group. (c) The list of taxa in the 3% protein group at genus level with more than 0.1% abundance in at least one group average. (d) The list of taxa in the 12% protein group at genus level with more than 0.1% abundance in at least one group.

**(a)**

| Phylum in 3%   |        |        |        |        |        |         |        |         |        |         |              |              | Adjusted p values |              |  |  |
|----------------|--------|--------|--------|--------|--------|---------|--------|---------|--------|---------|--------------|--------------|-------------------|--------------|--|--|
|                |        |        |        |        |        |         |        |         |        |         |              |              | day 0             |              |  |  |
|                | day 0  |        | day 7  |        | day 14 |         | day 21 |         | day 28 |         | vs day<br>7  | vs day<br>14 | vs day<br>21      | vs day<br>28 |  |  |
| Firmicutes     | 2342.8 | ± 73.5 | 2906.8 | ± 73.8 | 1553.2 | ± 125.2 | 1023   | ± 105.1 | 1474.4 | ± 278.0 | <b>0.032</b> | <b>0.032</b> | <b>0.032</b>      | <b>0.032</b> |  |  |
| Actinobacteria | 0.2    | ± 0.2  | 0.4    | ± 0.4  | 875.8  | ± 27.0  | 1124.6 | ± 40.2  | 675.8  | ± 67.7  | 1.000        | <b>0.032</b> | <b>0.032</b>      | <b>0.032</b> |  |  |
| Proteobacteria | 83.4   | ± 75.8 | 9.2    | ± 4.5  | 526.4  | ± 140.1 | 804.4  | ± 121.0 | 821.2  | ± 254.9 | 0.825        | <b>0.048</b> | <b>0.032</b>      | <b>0.048</b> |  |  |
| Bacteroidetes  | 569.6  | ± 47.0 | 82.6   | ± 71.2 | 44.2   | ± 20.1  | 46.8   | ± 25.6  | 28.4   | ± 22.2  | <b>0.032</b> | <b>0.032</b> | <b>0.032</b>      | <b>0.032</b> |  |  |
| Tenericutes    | 3.0    | ± 0.7  | 1.0    | ± 0.5  | 0.4    | ± 0.2   | 1.2    | ± 0.2   | 0      | ± 0.0   | 0.159        | 0.071        | 0.159             | <b>0.032</b> |  |  |

(b)

---

| Phylum in 12%  |        |         |        |        |        |        |        |        |        |        |              |              | Adjusted p values |              |  |  |
|----------------|--------|---------|--------|--------|--------|--------|--------|--------|--------|--------|--------------|--------------|-------------------|--------------|--|--|
|                | day 0  |         | day 7  |        | day 14 |        | day 21 |        | day 28 |        | vs day<br>7  | vs day<br>14 | vs day<br>21      | vs day<br>28 |  |  |
| Firmicutes     | 2417.8 | ± 116.7 | 2809.4 | ± 67.9 | 2828.2 | ± 43.9 | 2702.8 | ± 98.3 | 2866.4 | ± 36.9 | 0.063        | <b>0.032</b> | 0.151             | <b>0.032</b> |  |  |
| Proteobacteria | 0.0    | ± 0.0   | 68.4   | ± 52.2 | 41.2   | ± 19.2 | 114.2  | ± 45.8 | 96.6   | ± 35.9 | <b>0.048</b> | <b>0.032</b> | <b>0.032</b>      | <b>0.032</b> |  |  |
| Bacteroidetes  | 578.4  | ± 116.9 | 119.8  | ± 70.5 | 129.4  | ± 33.1 | 178.8  | ± 90.2 | 32.6   | ± 6.4  | 0.063        | <b>0.032</b> | 0.063             | <b>0.032</b> |  |  |

(c)

| Genus in 3% group       |        |         |        |         |        |         |       |         |       |          |              |              | Adjusted p values |              |  |  |
|-------------------------|--------|---------|--------|---------|--------|---------|-------|---------|-------|----------|--------------|--------------|-------------------|--------------|--|--|
|                         | day 0  | day 7   |        | day 14  |        | day 21  |       | day 28  |       | vs day 7 | vs day 14    | vs day 21    | vs day 28         |              |  |  |
| <i>Staphylococcus</i>   | 314.6  | ± 100.5 | 1465.4 | ± 186.1 | 1011.4 | ± 49.1  | 460.4 | ± 138.5 | 319.2 | ± 17.1   | <b>0.032</b> | 0.167        | 0.841             | 0.841        |  |  |
| <i>Lactobacillus</i>    | 1356.4 | ± 133.4 | 475.4  | ± 49.0  | 82.6   | ± 16.9  | 60    | ± 27.4  | 287.8 | ± 112.4  | <b>0.032</b> | <b>0.032</b> | <b>0.032</b>      | <b>0.032</b> |  |  |
| <i>Corynebacterium</i>  | 0      | ± 0.0   | 0.4    | ± 0.4   | 686.2  | ± 25.7  | 1033  | ± 33.1  | 661.2 | ± 61.3   | 1.000        | <b>0.032</b> | <b>0.032</b>      | <b>0.032</b> |  |  |
| <i>Citrobacter</i>      | 119.4  | ± 75.8  | 14.4   | ± 4.2   | 515    | ± 139.7 | 720.2 | ± 121.1 | 675.2 | ± 213.9  | 0.825        | <b>0.048</b> | <b>0.032</b>      | 0.063        |  |  |
| <i>Enterococcus</i>     | 6.4    | ± 0.4   | 0.4    | ± 0.2   | 0      | ± 0.2   | 29    | ± 21.4  | 553   | ± 197.9  | 0.810        | 0.810        | 0.381             | <b>0.032</b> |  |  |
| <i>Jeotgalicoccus</i>   | 3      | ± 0.7   | 495.4  | ± 183.0 | 347    | ± 26.5  | 211.8 | ± 16.0  | 59.6  | ± 14.1   | <b>0.032</b> | <b>0.032</b> | <b>0.032</b>      | <b>0.032</b> |  |  |
| <i>Lactococcus</i>      | 405    | ± 0.0   | 158.6  | ± 54.1  | 134.2  | ± 30.7  | 165.4 | ± 9.8   | 117.6 | ± 11.6   | <b>0.032</b> | <b>0.032</b> | <b>0.032</b>      | <b>0.032</b> |  |  |
| <i>Bacteroides</i>      | 98     | ± 18.7  | 34.2   | ± 20.2  | 9.8    | ± 11.7  | 23.8  | ± 5.8   | 21    | ± 18.6   | <b>0.048</b> | <b>0.048</b> | <b>0.032</b>      | <b>0.048</b> |  |  |
| <i>Microbacterium</i>   | 0      | ± 0.0   | 0      | ± 0.0   | 0      | ± 0.0   | 32.4  | ± 7.7   | 66.4  | ± 12.2   | 1.000        | 1.000        | <b>0.032</b>      | <b>0.032</b> |  |  |
| <i>Acinetobacter</i>    | 0      | ± 0.0   | 0      | ± 0.0   | 0      | ± 0.0   | 0     | ± 0.0   | 55.4  | ± 20.0   | 1.000        | 1.000        | 1.000             | <b>0.032</b> |  |  |
| <i>Enterobacter</i>     | 0      | ± 0.0   | 0      | ± 0.0   | 0      | ± 0.0   | 0     | ± 0.0   | 36.6  | ± 23.5   | 1.000        | 1.000        | 1.000             | <b>0.032</b> |  |  |
| <i>Dorea</i>            | 18     | ± 0.2   | 21.6   | ± 20.2  | 8.8    | ± 6.7   | 15    | ± 3.9   | 9.6   | ± 1.4    | 0.286        | <b>0.048</b> | <b>0.048</b>      | <b>0.032</b> |  |  |
| <i>Muribaculum</i>      | 15.8   | ± 3.2   | 5      | ± 0.0   | 0.4    | ± 0.5   | 1.8   | ± 0.9   | 0.4   | ± 0.0    | <b>0.032</b> | <b>0.032</b> | <b>0.032</b>      | <b>0.032</b> |  |  |
| <i>Lysinibacillus</i>   | 0      | ± 0.0   | 0      | ± 0.0   | 0.8    | ± 1.0   | 13.6  | ± 5.3   | 4.2   | ± 2.3    | 1.000        | 0.095        | <b>0.032</b>      | <b>0.032</b> |  |  |
| <i>Pseudoclavibacte</i> | 0      | ± 0.0   | 0      | ± 0.0   | 0      | ± 0.0   | 1.2   | ± 0.7   | 12.4  | ± 2.8    | 1.000        | 1.000        | 0.143             | <b>0.032</b> |  |  |
| <i>r</i>                |        |         |        |         |        |         |       |         |       |          |              |              |                   |              |  |  |
| <i>Bacillus</i>         | 0      | ± 0.0   | 0      | ± 0.0   | 0.2    | ± 0.8   | 9     | ± 3.3   | 4.2   | ± 1.4    | 1.000        | 0.889        | <b>0.032</b>      | 0.143        |  |  |





(d)

| Genus in 12% group            |         |        |       |         |        |        |        |         |        |        |              |              |              | Adjusted p values |  |  |  |
|-------------------------------|---------|--------|-------|---------|--------|--------|--------|---------|--------|--------|--------------|--------------|--------------|-------------------|--|--|--|
|                               | day 0   |        | day 7 |         | day 14 |        | day 21 |         | day 28 |        | vs day 7     | vs day 14    | vs day 21    | vs day 28         |  |  |  |
| <i>Lactococcus</i>            | 0.25    | ± 0.2  | 1645  | ± 122.6 | 2119.4 | ± 66.2 | 1817.6 | ± 122.6 | 2012.4 | ± 91.5 | <b>0.032</b> | <b>0.032</b> | <b>0.032</b> | <b>0.032</b>      |  |  |  |
| <i>Lactobacillus</i>          | 1696.25 | ± 69.2 | 445   | ± 60.8  | 156.8  | ± 17.4 | 238    | ± 136.6 | 172.8  | ± 29.0 | <b>0.032</b> | <b>0.032</b> | <b>0.032</b> | <b>0.032</b>      |  |  |  |
| <i>Bacteroides</i>            | 177.75  | ± 36.9 | 75.8  | ± 26.2  | 51     | ± 22.4 | 107.6  | ± 67.8  | 22     | ± 5.1  | 0.095        | 0.095        | 0.151        | <b>0.032</b>      |  |  |  |
| <i>Dorea</i>                  | 0       | ± 0.0  | 31.8  | ± 21.7  | 80.6   | ± 37.5 | 80.8   | ± 29.9  | 133.6  | ± 19.6 | <b>0.032</b> | <b>0.032</b> | <b>0.032</b> | <b>0.032</b>      |  |  |  |
| <i>Citrobacter</i>            | 0       | ± 0.0  | 66.2  | ± 52.3  | 21.4   | ± 18.8 | 130.2  | ± 46.2  | 59     | ± 35.8 | <b>0.048</b> | <b>0.032</b> | <b>0.032</b> | <b>0.032</b>      |  |  |  |
| <i>Staphylococcus</i>         | 128.75  | ± 23.9 | 47.4  | ± 4.7   | 7.8    | ± 2.0  | 6.8    | ± 1.2   | 2.4    | ± 0.4  | <b>0.032</b> | <b>0.032</b> | <b>0.032</b> | <b>0.032</b>      |  |  |  |
| <i>Streptococcus</i>          | 0       | ± 0.0  | 22.4  | ± 4.2   | 20.2   | ± 2.6  | 25.2   | ± 4.6   | 25.8   | ± 3.8  | <b>0.032</b> | <b>0.032</b> | <b>0.032</b> | <b>0.032</b>      |  |  |  |
| <i>Atopostipes</i>            | 5       | ± 1.5  | 13.6  | ± 6.1   | 9.6    | ± 1.1  | 0.2    | ± 0.2   | 0      | ± 0.0  | 0.302        | 0.302        | 3.000        | <b>0.032</b>      |  |  |  |
| <i>Muribaculum</i>            | 10.75   | ± 3.3  | 2.8   | ± 0.2   | 0.4    | ± 0.5  | 1.4    | ± 0.5   | 0.6    | ± 0.6  | <b>0.032</b> | <b>0.032</b> | <b>0.032</b> | <b>0.032</b>      |  |  |  |
| <i>Enterococcus</i>           | 0.25    | ± 0.2  | 4     | ± 4.6   | 6.8    | ± 3.1  | 9.4    | ± 3.6   | 10.4   | ± 4.0  | <b>0.048</b> | <b>0.048</b> | <b>0.048</b> | <b>0.032</b>      |  |  |  |
| <i>Candidatus Arthromitus</i> | 5.25    | ± 1.2  | 0.6   | ± 0.0   | 0      | ± 0.0  | 0      | ± 0.0   | 0      | ± 0.0  | <b>0.032</b> | <b>0.032</b> | <b>0.032</b> | <b>0.032</b>      |  |  |  |



|                                                     |       |   |      |       |   |      |      |   |     |      |   |      |      |   |      |              |              |              |              |
|-----------------------------------------------------|-------|---|------|-------|---|------|------|---|-----|------|---|------|------|---|------|--------------|--------------|--------------|--------------|
| OTU00022_Staphylococcus nepalensis (100%)           | 46    | ± | 15.3 | 230.4 | ± | 85.9 | 11.4 | ± | 3.3 | 2.2  | ± | 0.4  | 0.8  | ± | 0.6  | <b>0.032</b> | <b>0.032</b> | <b>0.032</b> | <b>0.032</b> |
| OTU00015_Lactobacillus reuteri (100%)               | 282.4 | ± | 45.3 | 2     | ± | 1.4  | 0    | ± | 0.0 | 0    | ± | 0.0  | 0    | ± | 0.0  | <b>0.032</b> | <b>0.032</b> | <b>0.032</b> | <b>0.032</b> |
| OTU00009_Candidatus Dorea massiliensis (96.91%)     | 0.2   | ± | 0.2  | 20.8  | ± | 19.6 | 16.2 | ± | 6.5 | 12   | ± | 3.7  | 5.6  | ± | 1.4  | 0.286        | <b>0.048</b> | <b>0.048</b> | <b>0.032</b> |
| OTU00010_Bacteroides acidifaciens (99.68%)          | 55    | ± | 9.4  | 16    | ± | 14.0 | 8.8  | ± | 3.6 | 7.8  | ± | 4.0  | 13.8 | ± | 12.8 | 0.095        | <b>0.032</b> | <b>0.032</b> | 0.095        |
| OTU00027_Barnesiella viscericola (82.65%)           | 67.4  | ± | 7.4  | 0     | ± | 0.0  | 0    | ± | 0.0 | 0    | ± | 0.0  | 0    | ± | 0.0  | <b>0.032</b> | <b>0.032</b> | <b>0.032</b> | <b>0.032</b> |
| OTU00051_Enterobacter ludwigii (100%)               | 0     | ± | 0.0  | 0     | ± | 0.0  | 0    | ± | 0.0 | 0    | ± | 0.0  | 43.6 | ± | 23.5 | 1.000        | 1.000        | 1.000        | <b>0.032</b> |
| OTU00016_Porphyrimonadaceae bacterium C941 (85.81%) | 50.8  | ± | 7.7  | 30.6  | ± | 26.0 | 6.2  | ± | 2.6 | 13.4 | ± | 5.9  | 3.2  | ± | 1.2  | 0.143        | <b>0.032</b> | <b>0.032</b> | <b>0.032</b> |
| OTU00012_Rikenella microfusum (81.85%)              | 102.6 | ± | 8.6  | 1.6   | ± | 0.9  | 1    | ± | 0.4 | 0.8  | ± | 0.6  | 0.4  | ± | 0.2  | <b>0.032</b> | <b>0.032</b> | <b>0.032</b> | <b>0.032</b> |
| OTU00045_Acinetobacter sp. STM18 (100%)             | 0     | ± | 0.0  | 0     | ± | 0.0  | 0    | ± | 0.0 | 0    | ± | 0.0  | 63.4 | ± | 19.7 | 1.000        | 1.000        | 1.000        | <b>0.032</b> |
| OTU00033_Porphyrimonadaceae bacterium C941 (86.77%) | 75.6  | ± | 17.5 | 0     | ± | 0.0  | 0    | ± | 0.0 | 0.2  | ± | 0.2  | 0.2  | ± | 0.2  | <b>0.032</b> | <b>0.032</b> | <b>0.032</b> | <b>0.032</b> |
| OTU00030_Enterococcus gallinarum (100%)             | 0.6   | ± | 0.4  | 0.2   | ± | 0.2  | 0.2  | ± | 0.2 | 33.2 | ± | 20.9 | 65.6 | ± | 11.8 | 1.000        | 1.000        | 0.310        | <b>0.032</b> |
| OTU00018_Microbacterium                             | 0     | ± | 0.0  | 0     | ± | 0.0  | 0    | ± | 0.0 | 34.8 | ± | 7.3  | 68.4 | ± | 11.7 | 1.000        | 1.000        | <b>0.032</b> | <b>0.032</b> |

|                            |              |      |   |     |      |   |     |      |   |     |     |   |     |     |   |     |              |              |              |              |
|----------------------------|--------------|------|---|-----|------|---|-----|------|---|-----|-----|---|-----|-----|---|-----|--------------|--------------|--------------|--------------|
| maritypicum (100%)         |              |      |   |     |      |   |     |      |   |     |     |   |     |     |   |     |              |              |              |              |
| OTU00017_Clostridiales     | bacterium    | 0.2  | ± | 0.2 | 10.4 | ± | 7.4 | 27.4 | ± | 4.3 | 0   | ± | 0.0 | 2.6 | ± | 1.5 | 0.889        | <b>0.032</b> | 1.000        | 0.500        |
| CIEAF 017 (100%)           |              |      |   |     |      |   |     |      |   |     |     |   |     |     |   |     |              |              |              |              |
| OTU00019_Bacteroides       | caecimuris   | 34.8 | ± | 6.5 | 0.2  | ± | 0.2 | 0    | ± | 0.0 | 0.2 | ± | 0.2 | 0   | ± | 0.0 | <b>0.032</b> | <b>0.032</b> | <b>0.032</b> | <b>0.032</b> |
| (99.37%)                   |              |      |   |     |      |   |     |      |   |     |     |   |     |     |   |     |              |              |              |              |
| OTU00011_Lactococcus       | lactis       | 0    | ± | 0.0 | 3.4  | ± | 1.2 | 4.8  | ± | 1.9 | 3.8 | ± | 1.2 | 3.8 | ± | 1.2 | 0.095        | <b>0.032</b> | <b>0.032</b> | 0.095        |
| (100%)                     |              |      |   |     |      |   |     |      |   |     |     |   |     |     |   |     |              |              |              |              |
| OTU00023_Eubacterium       |              | 50.2 | ± | 8.0 | 0.6  | ± | 0.6 | 0    | ± | 0.0 | 0   | ± | 0.0 | 0   | ± | 0.0 | <b>0.032</b> | <b>0.032</b> | <b>0.032</b> | <b>0.032</b> |
| coprostanoligenes (89.97%) |              |      |   |     |      |   |     |      |   |     |     |   |     |     |   |     |              |              |              |              |
| OTU00031_Gabonia           | massiliensis | 1.4  | ± | 7.9 | 0    | ± | 1.0 | 1.4  | ± | 0.0 | 0   | ± | 1.0 | 0   | ± | 0.0 | <b>0.032</b> | <b>0.032</b> | <b>0.032</b> | <b>0.032</b> |
| (84.03%)                   |              |      |   |     |      |   |     |      |   |     |     |   |     |     |   |     |              |              |              |              |

**(b)**

|                         |        | day0   |   | day7 |        | day14 |       | day21  |   | day28 |        | day 0 |       |        |     |      |              |              |              |              |
|-------------------------|--------|--------|---|------|--------|-------|-------|--------|---|-------|--------|-------|-------|--------|-----|------|--------------|--------------|--------------|--------------|
|                         |        |        |   |      |        |       |       |        |   |       |        | vs    | vs    | vs     | vs  |      |              |              |              |              |
|                         |        |        |   |      |        |       |       |        |   |       |        | day 7 | day   | day    | day |      |              |              |              |              |
|                         |        |        |   |      |        |       |       |        |   |       |        | 14    | 21    | 28     |     |      |              |              |              |              |
| OTU00001_Lactococcus    | lactis | 0.2    | ± | 0.2  | 2010.0 | ±     | 116.5 | 2038.2 | ± | 65.0  | 1706.2 | ±     | 117.7 | 1996.8 | ±   | 90.8 | <b>0.032</b> | <b>0.032</b> | <b>0.032</b> | <b>0.032</b> |
| (100%)                  |        |        |   |      |        |       |       |        |   |       |        |       |       |        |     |      |              |              |              |              |
| OTU00003_Staphylococcus |        | 113.6  | ± | 21.4 | 8.2    | ±     | 2.0   | 3.2    | ± | 1.2   | 4.2    | ±     | 0.7   | 0.0    | ±   | 0.0  | <b>0.032</b> | <b>0.032</b> | <b>0.032</b> | <b>0.032</b> |
| lentus (100%)           |        |        |   |      |        |       |       |        |   |       |        |       |       |        |     |      |              |              |              |              |
| OTU00002_Lactobacillus  |        | 1213.6 | ± | 99.1 | 20.6   | ±     | 9.1   | 0.2    | ± | 0.2   | 0.4    | ±     | 0.2   | 1.0    | ±   | 0.4  | <b>0.032</b> | <b>0.032</b> | <b>0.032</b> | <b>0.032</b> |
| johnsonii (100%)        |        |        |   |      |        |       |       |        |   |       |        |       |       |        |     |      |              |              |              |              |

|                                                         |       |   |      |       |   |      |      |   |      |       |   |      |       |   |      |              |              |              |              |
|---------------------------------------------------------|-------|---|------|-------|---|------|------|---|------|-------|---|------|-------|---|------|--------------|--------------|--------------|--------------|
| OTU00004_Citrobacter<br>amalonaticus (100%)             | 0.0   | ± | 0.0  | 67.8  | ± | 51.9 | 40.2 | ± | 18.4 | 112.8 | ± | 46.0 | 95.4  | ± | 35.5 | <b>0.048</b> | <b>0.032</b> | <b>0.032</b> | <b>0.032</b> |
| OTU00022_Staphylococcus<br>nepalensis (100%)            | 21.4  | ± | 4.5  | 6.8   | ± | 3.0  | 3.0  | ± | 0.9  | 1.6   | ± | 0.7  | 1.6   | ± | 0.2  | 0.056        | <b>0.032</b> | <b>0.032</b> | <b>0.032</b> |
| OTU00015_Lactobacillus reuteri<br>(100%)                | 197.8 | ± | 34.5 | 2.4   | ± | 0.7  | 0.0  | ± | 0.0  | 0.0   | ± | 0.0  | 0.0   | ± | 0.0  | <b>0.032</b> | <b>0.032</b> | <b>0.032</b> | <b>0.032</b> |
| OTU00009_Candidatus Dorea<br>massiliensis (96.91%)      | 0.0   | ± | 0.0  | 39.2  | ± | 21.7 | 89.4 | ± | 37.2 | 93.8  | ± | 29.6 | 120.4 | ± | 19.6 | <b>0.032</b> | <b>0.032</b> | <b>0.032</b> | <b>0.032</b> |
| OTU00010_Bacteroides<br>acidifaciens (99.68%)           | 71.6  | ± | 24.4 | 26.2  | ± | 14.2 | 35.0 | ± | 16.1 | 59.6  | ± | 34.9 | 13.2  | ± | 3.1  | 0.286        | 0.286        | 0.286        | <b>0.032</b> |
| OTU00021_Lachnospiraceae<br>bacterium 609 (99.07%)      | 0.4   | ± | 0.2  | 3.8   | ± | 2.0  | 21.4 | ± | 11.3 | 37.0  | ± | 12.2 | 62.0  | ± | 33.0 | 0.238        | 0.127        | <b>0.032</b> | <b>0.032</b> |
| OTU00013_Longibaculum muris<br>(86.75%)                 | 1.0   | ± | 1.0  | 100.4 | ± | 32.0 | 77.2 | ± | 19.3 | 62.4  | ± | 16.1 | 62.0  | ± | 30.6 | 0.095        | <b>0.032</b> | <b>0.048</b> | 0.095        |
| OTU00027_Barnesiella<br>viscericola (82.65%)            | 79.0  | ± | 25.0 | 0.0   | ± | 0.0  | 0.2  | ± | 0.2  | 0.0   | ± | 0.0  | 0.0   | ± | 0.0  | <b>0.032</b> | <b>0.032</b> | <b>0.032</b> | <b>0.032</b> |
| OTU00016_Porphyrimonadaceae<br>bacterium C941 (85.81%)  | 52.4  | ± | 16.6 | 32.0  | ± | 23.2 | 31.6 | ± | 11.8 | 15.2  | ± | 9.0  | 1.6   | ± | 0.7  | 0.333        | 0.333        | 0.095        | <b>0.032</b> |
| OTU00012_Rikenella microfusus<br>(81.85%)               | 66.0  | ± | 13.7 | 4.2   | ± | 2.4  | 4.0  | ± | 1.1  | 3.0   | ± | 1.0  | 1.6   | ± | 0.9  | <b>0.032</b> | <b>0.032</b> | <b>0.032</b> | <b>0.032</b> |
| OTU00024_Streptococcus sp.<br>oral clone AY020 (93.95%) | 8.4   | ± | 1.1  | 42.8  | ± | 9.0  | 56.4 | ± | 7.8  | 61.0  | ± | 16.6 | 50.4  | ± | 7.1  | <b>0.032</b> | <b>0.032</b> | <b>0.032</b> | <b>0.032</b> |
| OTU00033_Porphyrimonadaceae                             | 64.6  | ± | 15.1 | 1.6   | ± | 1.0  | 0.2  | ± | 0.2  | 0.8   | ± | 0.6  | 0.6   | ± | 0.4  | <b>0.032</b> | <b>0.032</b> | <b>0.032</b> | <b>0.032</b> |

|                                                      |      |        |      |        |      |        |      |        |      |        |              |              |              |              |  |  |  |
|------------------------------------------------------|------|--------|------|--------|------|--------|------|--------|------|--------|--------------|--------------|--------------|--------------|--|--|--|
| bacterium C941 (86.77%)                              |      |        |      |        |      |        |      |        |      |        |              |              |              |              |  |  |  |
| OTU00030_Enterococcus<br>gallinarum (100%)           | 0.2  | ± 0.2  | 9.4  | ± 4.6  | 4.6  | ± 2.9  | 7.4  | ± 3.6  | 14.4 | ± 4.0  | <b>0.048</b> | <b>0.048</b> | <b>0.048</b> | <b>0.032</b> |  |  |  |
| OTU00029_Lachnospiraceae<br>bacterium A4 (91.69%)    | 0.8  | ± 0.8  | 13.2 | ± 6.6  | 19.6 | ± 3.3  | 47.8 | ± 19.9 | 54.6 | ± 12.0 | 0.087        | <b>0.032</b> | <b>0.032</b> | <b>0.032</b> |  |  |  |
| OTU00017_Clostridiales<br>bacterium CIEAF 017 (100%) | 0.0  | ± 0.0  | 20.8 | ± 12.9 | 46.8 | ± 13.3 | 58.4 | ± 15.1 | 24.4 | ± 3.7  | 0.444        | <b>0.032</b> | <b>0.032</b> | <b>0.032</b> |  |  |  |
| OTU00044_Lachnospiraceae<br>bacterium A4 (98.72%)    | 30.6 | ± 16.8 | 0.0  | ± 0.0  | 0.0  | ± 0.0  | 0.0  | ± 0.0  | 0.0  | ± 0.0  | <b>0.032</b> | <b>0.032</b> | <b>0.032</b> | <b>0.032</b> |  |  |  |
| OTU00019_Bacteroides<br>caecimuris (99.37%)          | 61.0 | ± 8.4  | 1.0  | ± 0.4  | 0.2  | ± 0.2  | 0.4  | ± 0.2  | 0.0  | ± 0.0  | <b>0.032</b> | <b>0.032</b> | <b>0.032</b> | <b>0.032</b> |  |  |  |
| OTU00011_Lactococcus<br>lactis (100%)                | 0.0  | ± 0.0  | 57.8 | ± 6.7  | 59.4 | ± 4.9  | 55.0 | ± 5.6  | 65.4 | ± 3.8  | <b>0.032</b> | <b>0.032</b> | <b>0.032</b> | <b>0.032</b> |  |  |  |
| OTU00023_Eubacterium<br>coprostanoligenes (89.97%)   | 32.6 | ± 9.3  | 0.6  | ± 0.2  | 0.0  | ± 0.0  | 0.0  | ± 0.0  | 0.0  | ± 0.0  | <b>0.032</b> | <b>0.032</b> | <b>0.032</b> | <b>0.032</b> |  |  |  |
| OTU00031_Gabonia<br>massiliensis (84.03%)            | 3.4  | ± 6.4  | 0.2  | ± 2.2  | 0.0  | ± 0.2  | 0.0  | ± 0.0  | 0.0  | ± 0.0  | <b>0.032</b> | <b>0.032</b> | <b>0.032</b> | <b>0.032</b> |  |  |  |

Supplementary Table S3. Nutrient composition of the 3%, 6%, 9%, and 12% protein diets used in this study. Raw material mixture and estimated nutrient contents per 100 g are listed.

|                                                                                   | 3%     | 6%     | 9%     | 12%    |
|-----------------------------------------------------------------------------------|--------|--------|--------|--------|
| <i>Raw material mixture (g)</i>                                                   |        |        |        |        |
| Milk caseins                                                                      | 3.3    | 6.7    | 10.0   | 13.3   |
| L-cysteine                                                                        | 0.05   | 0.10   | 0.15   | 0.20   |
| Cornstarch                                                                        | 52.4   | 49.8   | 47.3   | 44.8   |
| $\alpha$ -cornstarch                                                              | 17.5   | 16.6   | 15.8   | 14.9   |
| Sucrose                                                                           | 10.0   | 10.0   | 10.0   | 10.0   |
| Soybean oil                                                                       | 7.0    | 7.0    | 7.0    | 7.0    |
| Cellulose powder                                                                  | 5.0    | 5.0    | 5.0    | 5.0    |
| AIN-93G mineral mixed                                                             | 3.5    | 3.5    | 3.5    | 3.5    |
| AIN-93 vitamin mixed                                                              | 1.0    | 1.0    | 1.0    | 1.0    |
| Choline bitartrate proportion                                                     | 0.25   | 0.25   | 0.25   | 0.25   |
| Tertiary butyl hydroquinone                                                       | 0.0014 | 0.0014 | 0.0014 | 0.0014 |
| <i>Estimated nutrients composition (%) and energy content (kcal) in 100g diet</i> |        |        |        |        |
| Crude protein                                                                     | 3.0    | 6.0    | 9.0    | 12.0   |
| Crude fat                                                                         | 7.0    | 7.0    | 7.0    | 7.0    |
| Nitrogen free extract                                                             | 81.6   | 78.2   | 74.8   | 71.5   |
| Energy                                                                            | 401    | 400    | 398    | 397    |



Supplementary Table S4. Sample size estimation to power our study with body weight data based on significance level 0.05 and statistical power 0.80.

| Day | Significance level | Power | SE   | SD   | Average body weight |      |      |      | Sample size |
|-----|--------------------|-------|------|------|---------------------|------|------|------|-------------|
|     |                    |       |      |      | 3%                  | 6%   | 9%   | 12%  |             |
| 0   | 0.05               | 0.80  | 0.62 | 1.38 | 27.8                | 28.0 | 27.9 | 27.9 | 2558        |
| 7   | 0.05               | 0.80  | 0.76 | 1.70 | 27.4                | 28.8 | 29.2 | 30.0 | 39          |
| 14  | 0.05               | 0.80  | 0.81 | 1.81 | 26.2                | 29.1 | 29.8 | 31.0 | 16          |
| 21  | 0.05               | 0.80  | 0.85 | 1.91 | 26.8                | 30.0 | 30.4 | 32.1 | 16          |
| 28  | 0.05               | 0.80  | 0.87 | 1.95 | 26.7                | 30.2 | 31.0 | 32.1 | 15          |
